# Supplementary material
Source: HighWire-hosted journal article supplement (https://www.qdcxjkg.com/highwire/filestream/121524/field_highwire_adjunct_files/2/ERJ-00541-2015_Figure_S2.pdf)

**FIGURE S2.**

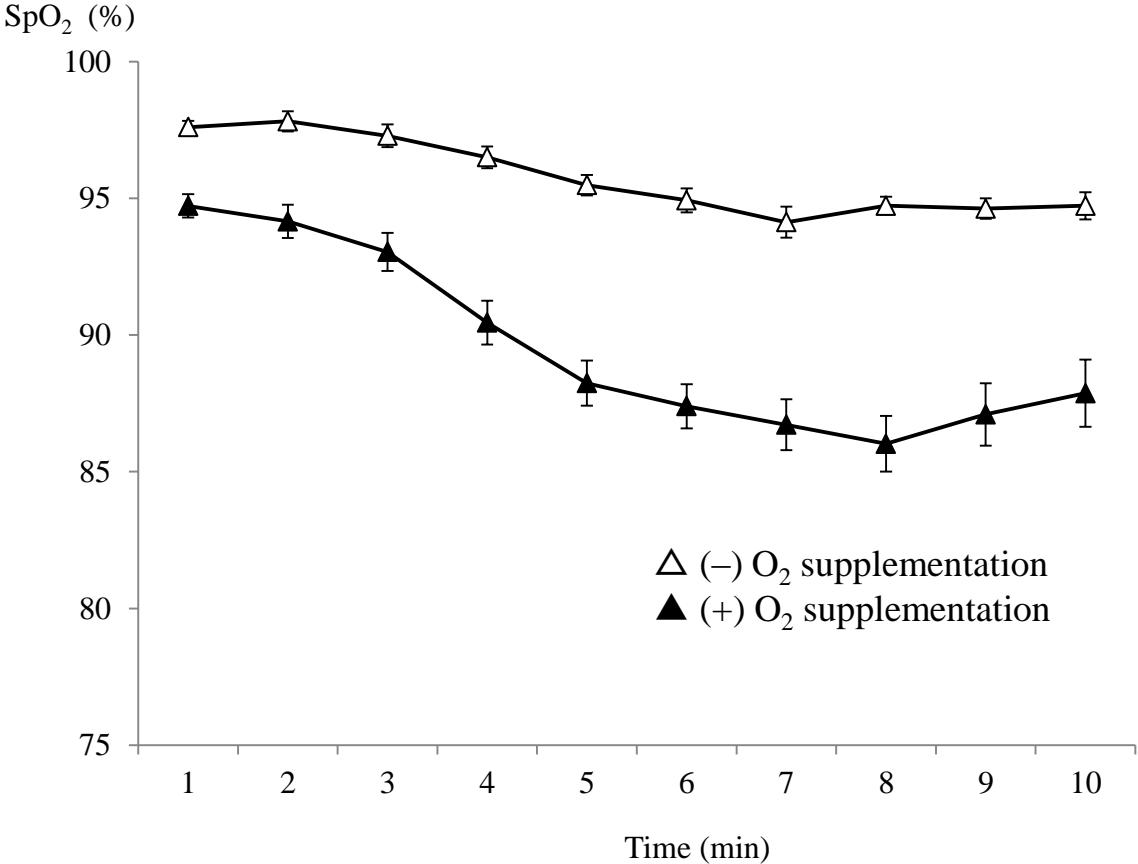

Supplement: ERJ-00541-2015_Figure_S2.pdf [file ERJ-00541-2015_Figure_S2.pdf]
